# Supplementary material for: Graphene layers on bimetallic Ni/Cu(111) surface and near surface alloys in controlled growth of graphene
Source: Royal Society of Chemistry journal article supplement (doi:10.1039/c6ra14315f), 2016-01-01
Supplement: c6ra14315f1.pdf [file c6ra14315f1.pdf]

## Supplementary Material

### Graphene layers on bimetallic Ni/Cu(111) surface and near surface alloys in controlled growth of graphene

Xin Bian <sup>a</sup>, Qiang Wang <sup>a,\*</sup>, Xinyan Wang<sup>a,d</sup>, Lu Wang <sup>a</sup>, Wei-qi Li <sup>b</sup>, Guang-hui

Chen <sup>c</sup>, and Hongjun Zhu <sup>a,\*</sup>

<sup>a</sup>Department of Applied Chemistry, College of Chemistry and Molecular Engineering,  
Nanjing Tech University, Nanjing 211816, P. R. China

<sup>b</sup>Department of Physics, Harbin Institute of Technology, Harbin 150001, P. R. China

<sup>c</sup>Department of Chemistry, Shantou University, Shantou, Guangdong, 515063, P. R.  
China

<sup>d</sup>Technology Center, Shanghai Meishan Iron & steel CO. Ltd., Nanjing, Jiangsu  
210039, P. R. China

\*Corresponding author.

E-mail address: [wangqiang@njtech.edu.cn](mailto:wangqiang@njtech.edu.cn) (Qiang Wang)

[zhuhj@njtech.edu.cn](mailto:zhuhj@njtech.edu.cn) (Hongjun Zhu)

Tel. / Fax: + 86-25-83172358

**(1) Table S1** Bader charges (e/atom) of Ni(111), Cu(111) and Ni/Cu(111) SAs and  
NASs. S2

**(2) Table S2** Bader charges (e/atom) of the graphene bottom layer, Ni(111), Cu(111)  
and Ni/Cu(111) SAs and NASs in graphene-metal systems. S3

**Table S1** Bader charges (e/atom) of Ni(111), Cu(111) and Ni/Cu(111) SAs and NASs

|               | *L <sub>1</sub> | L <sub>2</sub> | L <sub>3</sub> | L <sub>4</sub> | L <sub>5</sub> | L <sub>6</sub> |
|---------------|-----------------|----------------|----------------|----------------|----------------|----------------|
| Ni(111)       | -0.03           | +0.03          | 0.00           | 0.00           | +0.03          | -0.03          |
| Ni(111)-Ni-Cu | 0.00            | -0.01          | +0.01          | 0.00           | +0.03          | -0.03          |
| Ni(111)-Cu-Ni | -0.04           | +0.06          | -0.02          | 0.00           | +0.03          | -0.03          |
| Cu(111)-Ni-Cu | 0.01            | -0.04          | +0.03          | +0.01          | +0.02          | -0.03          |
| Cu(111)-Cu-Ni | -0.06           | +0.06          | 0.00           | +0.01          | +0.02          | -0.03          |
| Cu(111)       | -0.02           | +0.02          | 0.00           | 0.00           | +0.02          | -0.02          |

\*The L<sub>n</sub> is the number of the substrate layer.

**Table S2** Bader charges (e/atom) of the graphene bottom layer and metal substrates.  $C_A$  and  $C_B$  correspond to the illustration in Fig. 4, which are indicated C atoms sitting on top of the Ni atoms (labeled as the  $C_A$ ) and sitting on hollow sites (labeled as the  $C_B$ ). The  $Ni_n$  and  $Cu_n$  represent the Ni and Cu atom at the n layer of the Ni/Cu SAs and NSAs.

| Stacking      |          | Monolayer |        | Bilayer |        |        |        |
|---------------|----------|-----------|--------|---------|--------|--------|--------|
|               |          | FCC       | HCP    | AB      |        | AA     |        |
| Location      |          | FCC       | HCP    | FCC     | HCP    | FCC    | HCP    |
| Ni(111)       | $C_{A1}$ | - 0.24    | - 0.24 | - 0.22  | - 0.24 | - 0.22 | - 0.24 |
|               | $C_{B1}$ | +0.12     | +0.11  | +0.10   | +0.12  | +0.10  | +0.12  |
|               | $Ni_1$   | +0.11     | +0.11  | +0.11   | +0.12  | +0.12  | +0.12  |
|               | $Ni_2$   | +0.01     | +0.01  | +0.01   | +0.01  | +0.02  | +0.01  |
|               | $Ni_3$   | 0.00      | 0.00   | 0.00    | 0.00   | 0.00   | 0.00   |
| Ni(111)-Cu-Ni | $C_{A1}$ | - 0.21    | - 0.21 | - 0.25  | - 0.21 | - 0.24 | - 0.21 |
|               | $C_{B1}$ | +0.12     | +0.12  | +0.13   | +0.12  | +0.11  | +0.11  |
|               | $Ni_1$   | +0.06     | +0.06  | +0.11   | +0.07  | +0.11  | +0.07  |
|               | $Cu_2$   | +0.05     | +0.05  | +0.04   | +0.04  | +0.04  | +0.04  |
|               | $Ni_3$   | - 0.02    | - 0.02 | - 0.02  | - 0.02 | - 0.02 | - 0.02 |
| Cu(111)-Cu-Ni | $C_{A1}$ | - 0.22    | - 0.22 | - 0.22  | - 0.22 | - 0.22 | - 0.22 |
|               | $C_{B1}$ | +0.06     | +0.06  | +0.07   | +0.07  | +0.07  | +0.07  |
|               | $Ni_1$   | +0.14     | +0.14  | +0.14   | +0.14  | +0.14  | +0.14  |
|               | $Cu_2$   | +0.02     | +0.03  | +0.02   | +0.03  | +0.02  | +0.02  |
|               | $Cu_3$   | - 0.01    | 0.00   | 0.00    | 0.00   | 0.00   | 0.00   |
| Ni(111)-Ni-Cu | $C_{A1}$ | - 0.17    | - 0.16 | - 0.17  | - 0.17 | - 0.18 | - 0.18 |
|               | $C_{B1}$ | +0.16     | +0.15  | +0.16   | +0.16  | +0.16  | +0.17  |
|               | $Cu_1$   | +0.02     | +0.01  | +0.01   | +0.02  | +0.02  | +0.01  |
|               | $Ni_2$   | - 0.01    | - 0.01 | 0.00    | - 0.01 | - 0.01 | 0.00   |
|               | $Ni_3$   | +0.01     | +0.01  | 0.00    | +0.01  | +0.01  | 0.00   |
| Cu(111)-Ni-Cu | $C_{A1}$ | - 0.11    | - 0.11 | - 0.12  | - 0.12 | - 0.13 | - 0.12 |
|               | $C_{B1}$ | +0.09     | +0.09  | +0.10   | +0.10  | +0.10  | +0.10  |
|               | $Cu_1$   | +0.02     | +0.02  | +0.02   | +0.03  | +0.04  | +0.03  |
|               | $Ni_2$   | - 0.03    | - 0.03 | - 0.03  | - 0.03 | - 0.03 | - 0.03 |

|         |                 |       |       |       |       |       |       |
|---------|-----------------|-------|-------|-------|-------|-------|-------|
| Cu(111) | Cu <sub>3</sub> | +0.02 | +0.03 | +0.02 | +0.02 | +0.02 | +0.02 |
|         | C <sub>A1</sub> | -0.13 | -0.11 | -0.12 | -0.12 | -0.12 | -0.11 |
|         | C <sub>B1</sub> | +0.10 | +0.10 | +0.10 | +0.10 | +0.10 | +0.10 |
|         | Cu <sub>1</sub> | 0.00  | -0.01 | 0.00  | 0.00  | 0.00  | 0.00  |
|         | Cu <sub>2</sub> | +0.02 | +0.02 | +0.02 | +0.02 | +0.02 | +0.02 |
|         | Cu <sub>3</sub> | +0.01 | +0.01 | +0.01 | +0.01 | +0.01 | +0.01 |

---
